# Supplementary material for: A Phase 2 Study Evaluating the Safety, Tolerability, and Immunogenicity of Two 3-Dose Regimens of a Clostridium difficile Vaccine in Healthy US Adults Aged 65 to 85 Years
Source: PubMed Central journal article supplement — Clin Infect Dis. 2019 May 24;70(1):1–10. doi: 10.1093/cid/ciz153 (PMC6912159; doi:10.1093/cid/ciz153), 2019-05-24
Supplement: ciz153_suppl_supplementary_materials.pdf [file ciz153_suppl_supplementary_materials.pdf]

## **Supplementary Appendix**

### *Exclusion Criteria*

Exclusion criteria included (1) previous receipt of a *C difficile* vaccine or monoclonal antibody (mAb) therapy; (2) proven or suspected history of CDI; (3) unstable chronic medical condition(s); (4) serious chronic medical disorders; (5) any condition associated with prolonged bleeding, including receipt of antithrombotic, antiplatelet, or anticoagulants other than daily aspirin ( $\leq 325$  mg/d) within 30 days of enrollment; (6) any contraindication to vaccination; (7) immunodeficiency disorders or receipt of immunosuppressive drugs within 1 year of enrollment or treatment with systemic corticosteroids for  $\geq 7$  days within 90 days of enrollment through study conclusion; (8) blood or bone marrow disorder treated within the previous year or history of bone marrow transplant; (9) malignancy requiring treatment within the last 24 months; (10) receipt of oral or parenteral antibiotics within 1 month before enrollment; (11) receipt of blood products, including immunoglobulins, within 6 months before enrollment through study conclusion; (12) participation in other studies using investigative drugs within 30 days before enrollment throughout the study duration; (13) being directly involved in the study conduct or related to someone directly involved in the study conduct, or site staff members otherwise supervised by the study investigator; (14) residence in a nursing home, long-term-care facility, or requirement for semiskilled nursing care or assisted living; (15) infection with HIV, hepatitis B virus, or hepatitis C virus; or (16) had any other condition judged by the investigator to complicate study participation and/or results interpretation.

### *Reasons for Temporary Delay of Vaccination*

Vaccination could be temporarily delayed in the case of (1) acute illness (delay of 48 hours); (2) receipt of nonlive influenza vaccine (14 days) or any other vaccine (28 days); (3) receipt of systemic

antibiotics for an acute illness (72 hours); or (4) receipt of systemic corticosteroids for <7 days (1 month after cessation of treatment).

#### *Determination of the Neutralization Threshold*

Based on the phase 2 efficacy data from Merck/Medarex in which a combination of 2 mAbs against toxin A and toxin B was tested in patients who had experienced  $\geq 1$  episode of *C difficile*-associated diarrhea (CDAD) [34], it was inferred that toxin A-neutralizing and toxin B-neutralizing mAb levels above a threshold of 10  $\mu\text{g}/\text{mL}$  are associated with protection against CDAD. The “protective” 50% neutralization titer for each antibody was therefore estimated to be the antibody concentration at the protective threshold of 10  $\mu\text{g}/\text{mL}$  divided by the respective mAb half maximal inhibitory concentration (IC50; 50% neutralization titer = mAb concentration  $\div$  mAb IC50) given the similarity of the neutralization assays used in the field. Because Pfizer’s neutralization assay employs a reference standard, the 50% neutralization titers corresponding to the estimated thresholds were then experimentally bridged to Pfizer’s neutralization U/mL.

**Table S1. Percentages of subjects achieving prespecified levels of toxin A– and toxin B–specific neutralizing antibodies in the month and day regimens.**

|                      | Toxin A–Specific Neutralizing Antibody |                                    |                                    | Toxin B–Specific Neutralizing Antibody |                                    |                                    |
|----------------------|----------------------------------------|------------------------------------|------------------------------------|----------------------------------------|------------------------------------|------------------------------------|
|                      | Placebo                                | 100 µg <i>C diff</i>               | 200 µg <i>C diff</i>               | Placebo                                | 100 µg <i>C diff</i>               | 200 µg <i>C diff</i>               |
| Sampling             | n <sup>a</sup> /N <sup>b</sup> (%)     | n <sup>a</sup> /N <sup>b</sup> (%) | n <sup>a</sup> /N <sup>b</sup> (%) | n <sup>a</sup> /N <sup>b</sup> (%)     | n <sup>a</sup> /N <sup>b</sup> (%) | n <sup>a</sup> /N <sup>b</sup> (%) |
| Time Point           | 95% CI <sup>c</sup>                    | 95% CI <sup>c</sup>                | 95% CI <sup>c</sup>                | 95% CI <sup>c</sup>                    | 95% CI <sup>c</sup>                | 95% CI <sup>c</sup>                |
| <b>Month Regimen</b> |                                        |                                    |                                    |                                        |                                    |                                    |
| Day 1                | 1/53 (1.9)<br>(0.0, 10.1)              | 1/163 (0.6)<br>(0.0, 3.4)          | 2/158 (1.3)<br>(0.2, 4.5)          | 2/53 (3.8)<br>(0.5, 13.0)              | 4/163 (2.5)<br>(0.7, 6.2)          | 7/158 (4.4)<br>(1.8, 8.9)          |
| Day 30               | 0/53 (0.0)<br>(0.0, 6.7)               | 28/162 (17.3)<br>(11.8, 24.0)      | 30/157 (19.1)<br>(13.3, 26.1)      | 1/53 (1.9)<br>(0.0, 10.1)              | 42/162 (25.9)<br>(19.4, 33.4)      | 58/157 (36.9)<br>(29.4, 45.0)      |
| Day 37               | 1/53 (1.9)<br>(0.0, 10.1)              | 71/163 (43.6)<br>(35.8, 51.5)      | 89/157 (56.7)<br>(48.6, 64.6)      | 2/53 (3.8)<br>(0.5, 13.0)              | 47/163 (28.8)<br>(22.0, 36.4)      | 60/157 (38.2)<br>(30.6, 46.3)      |
| Month 2              | 1/53 (1.9)<br>(0.0, 10.1)              | 67/163 (41.1)<br>(33.5, 49.1)      | 90/158 (57.0)<br>(48.9, 64.8)      | 3/53 (5.7)<br>(1.2, 15.7)              | 47/163 (28.8)<br>(22.0, 36.4)      | 58/158 (36.7)<br>(29.2, 44.7)      |
| Month 6              | 1/53 (1.9)<br>(0.0, 10.1)              | 25/163 (15.3)<br>(10.2, 21.8)      | 32/158 (20.3)<br>(14.3, 27.4)      | 0/53 (0.0)<br>(0.0, 6.7)               | 32/163 (19.6)<br>(13.8, 26.6)      | 44/158 (27.8)<br>(21.0, 35.5)      |
| Day 187              | 0/53 (0.0)<br>(0.0, 6.7)               | 130/162 (80.2)<br>(73.3, 86.1)     | 134/158 (84.8)<br>(78.2, 90.0)     | 1/53 (1.9)<br>(0.0, 10.1)              | 94/162 (58.0)<br>(50.0, 65.7)      | 101/158 (63.9)<br>(55.9, 71.4)     |
| Month 7              | 1/53 (1.9)<br>(0.0, 10.1)              | 160/163 (98.2)<br>(94.7, 99.6)     | 151/158 (95.6)<br>(91.1, 98.2)     | 4/53 (7.5)<br>(2.1, 18.2)              | 122/163 (74.8)<br>(67.5, 81.3)     | 138/158 (87.3)<br>(81.1, 92.1)     |
| Month 12             | 1/51 (2.0)<br>(0.0, 10.4)              | 115/160 (71.9)<br>(64.2, 78.7)     | 120/155 (77.4)<br>(70.0, 83.7)     | 3/51 (5.9)<br>(1.2, 16.2)              | 71/160 (44.4)<br>(36.5, 52.4)      | 88/155 (56.8)<br>(48.6, 64.7)      |
| Month 18             | 2/51 (3.9)                             | 75/154 (48.7)                      | 81/152 (53.3)                      | 4/51 (7.8)                             | 53/154 (34.4)                      | 72/152 (47.4)                      |

|             | (0.5, 13.5) | (40.6, 56.9)   | (45.0, 61.4)   | (2.2, 18.9) | (27.0, 42.5)  | (39.2, 55.6)  |
|-------------|-------------|----------------|----------------|-------------|---------------|---------------|
| <hr/>       |             |                |                |             |               |               |
| Day Regimen |             |                |                |             |               |               |
| <hr/>       |             |                |                |             |               |               |
| Day 1       | 0/56 (0.0)  | 2/171 (1.2)    | 1/164 (0.6)    | 3/56 (5.4)  | 8/171 (4.7)   | 6/164 (3.7)   |
|             | (0.0, 6.4)  | (0.1, 4.2)     | (0.0, 3.4)     | (1.1, 14.9) | (2.0, 9.0)    | (1.4, 7.8)    |
| Day 8       | 0/56 (0.0)  | 8/171 (4.7)    | 11/165 (6.7)   | 2/56 (3.6)  | 17/171 (9.9)  | 19/165 (11.5) |
|             | (0.0, 6.4)  | (2.0, 9.0)     | (3.4, 11.6)    | (0.4, 12.3) | (5.9, 15.4)   | (7.1, 17.4)   |
| Day 15      | 0/56 (0.0)  | 29/171 (17.0)  | 41/164 (25.0)  | 2/56 (3.6)  | 52/171 (30.4) | 61/164 (37.2) |
|             | (0.0, 6.4)  | (11.7, 23.4)   | (18.6, 32.3)   | (0.4, 12.3) | (23.6, 37.9)  | (29.8, 45.1)  |
| Day 30      | 0/56 (0.0)  | 45/171 (26.3)  | 60/164 (36.6)  | 2/56 (3.6)  | 51/171 (29.8) | 61/164 (37.2) |
|             | (0.0, 6.4)  | (19.9, 33.6)   | (29.2, 44.5)   | (0.4, 12.3) | (23.1, 37.3)  | (29.8, 45.1)  |
| Day 37      | 7/56 (12.5) | 117/171 (68.4) | 141/165 (85.5) | 1/56 (1.8)  | 51/171 (29.8) | 64/165 (38.8) |
|             | (5.2, 24.1) | (60.9, 75.3)   | (79.1, 90.5)   | (0.0, 9.6)  | (23.1, 37.3)  | (31.3, 46.7)  |
| Month 2     | 2/56 (3.6)  | 105/171 (61.4) | 141/165 (85.5) | 1/56 (1.8)  | 50/171 (29.2) | 61/165 (37.0) |
|             | (0.4, 12.3) | (53.7, 68.7)   | (79.1, 90.5)   | (0.0, 9.6)  | (22.5, 36.7)  | (29.6, 44.8)  |
| Month 4     | 1/55 (1.8)  | 50/170 (29.4)  | 86/164 (52.4)  | 0/55 (0.0)  | 45/170 (26.5) | 51/164 (31.1) |
|             | (0.0, 9.7)  | (22.7, 36.9)   | (44.5, 60.3)   | (0.0, 6.5)  | (20.0, 33.8)  | (24.1, 38.8)  |
| Month 7     | 0/54 (0.0)  | 25/166 (15.1)  | 50/159 (31.4)  | 0/54 (0.0)  | 40/166 (24.1) | 42/159 (26.4) |
|             | (0.0, 6.6)  | (10.0, 21.4)   | (24.3, 39.3)   | (0.0, 6.6)  | (17.8, 31.3)  | (19.7, 34.0)  |
| Month 13    | 1/54 (1.9)  | 16/158 (10.1)  | 40/155 (25.8)  | 1/54 (1.9)  | 31/158 (19.6) | 48/155 (31.0) |
|             | (0.0, 9.9)  | (5.9, 15.9)    | (19.1, 33.4)   | (0.0, 9.9)  | (13.7, 26.7)  | (23.8, 38.9)  |

*C diff*=*Clostridium difficile* vaccine

<sup>a</sup>n=number of subjects achieving toxin A– or toxin B–specific neutralizing antibody levels  $\geq$  threshold.

<sup>b</sup>N=number of subjects with valid and determinate assay results for the specified neutralizing antibody.

<sup>c</sup>2-sided CIs are calculated based on the Clopper-Pearson method.
